# Supplementary material for: The nudibranch Berghia stephanieae (Valdés, 2005) is not able to initiate a functional symbiosome-like environment to maintain Breviolum minutum (J.E.Parkinson & LaJeunesse 2018)
Source: Frontiers journal article supplement (doi:10.3389/fmars.2022.934307), 2022-10-03
Supplement: downloadfile [file 934307]

**Supplementary material**

**References**

Walter, W., Sánchez-Cabo, F., & Ricote, M. (2015). GOplot: an R package for visually combining expression data with functional analysis. *Bioinformatics,* 31(17), 2912-2914.
