# Supplementary material for: The nudibranch Berghia stephanieae (Valdés, 2005) is not able to initiate a functional symbiosome-like environment to maintain Breviolum minutum (J.E.Parkinson & LaJeunesse 2018)
Source: Frontiers journal article supplement (doi:10.3389/fmars.2022.934307), 2022-10-03
Supplement: downloadfile [file 934307]

**Supplementary Table 2.** Summary of RNA sequencing data information of *Berghia stephanieae*.

| Condition    |         | Sample | Raw reads Paired-end | Raw data | Effective(%) | Error(%) | Q20(%) | Q30(%) | GC(%) | Raw reads after BBSplit (paired-end) |
|--------------|---------|--------|----------------------|----------|--------------|----------|--------|--------|-------|--------------------------------------|
| Aposymbiotic | Starved | A1     | 57536758             | 8,6      | 98,53        | 0,03     | 97,32  | 92,92  | 40,47 | 56122922                             |
|              | Starved | A2     | 56845036             | 8,5      | 98,06        | 0,03     | 96,82  | 91,8   | 39,62 | 55607248                             |
|              | Starved | A3     | 55144492             | 8,3      | 97,74        | 0,03     | 96,92  | 91,9   | 41,53 | 52946256                             |
|              | Refed   | A4     | 56416476             | 8,5      | 98,35        | 0,03     | 97,27  | 92,58  | 41,14 | 53381120                             |
|              | Refed   | A5     | 55628646             | 8,3      | 98,14        | 0,03     | 96,86  | 91,85  | 39,84 | 48248998                             |
|              | Refed   | A6     | 69410298             | 10,4     | 98,1         | 0,03     | 96,91  | 91,86  | 42    | 54072846                             |
|              | Fed     | A7     | 74426506             | 11,2     | 99,16        | 0,03     | 97,69  | 93,49  | 46,75 | 60356744                             |
|              | Fed     | A8     | 82084356             | 12,3     | 98,78        | 0,03     | 97,26  | 92,74  | 50,65 | 69681974                             |
|              | Fed     | A9     | 79560100             | 11,9     | 98,82        | 0,03     | 97,38  | 92,85  | 45,07 | 69341948                             |
| Symbiotic    | Fed     | S1     | 78401652             | 11,10    | 98,74        | 0,03     | 97,56  | 93,46  | 40,59 | 55718024                             |
|              | Fed     | S2     | 78858224             | 11,70    | 98,76        | 0,03     | 97,7   | 93,77  | 40,8  | 48075996                             |
|              | Fed     | S3     | 57619200             | 8,10     | 98,39        | 0,03     | 97,36  | 93,19  | 40,09 | 42975048                             |
|              | Refed   | S4     | 72221684             | 10,10    | 98,5         | 0,03     | 97,74  | 93,79  | 40,76 | 60200342                             |
|              | Refed   | S5     | 64023254             | 9,10     | 98,46        | 0,03     | 97,78  | 93,83  | 40,25 | 50726274                             |
|              | Refed   | S6     | 62739464             | 9,3      | 98,74        | 0,03     | 97,71  | 93,72  | 40,44 | 55700052                             |
|              | Starved | S7     | 67119036             | 9,9      | 98,74        | 0,03     | 97,74  | 93,72  | 38,12 | 65869354                             |
|              | Starved | S8     | 73935468             | 11       | 98,77        | 0,03     | 97,74  | 93,73  | 40,09 | 72357830                             |
|              | Starved | S9     | 68421012             | 10,1     | 98,88        | 0,03     | 97,61  | 93,59  | 39,2  | 66637434                             |
| <b>Total</b> |         |        | <b>1210391662</b>    |          |              |          |        |        |       | <b>1038020410</b>                    |
