# Supplementary material for: The nudibranch Berghia stephanieae (Valdés, 2005) is not able to initiate a functional symbiosome-like environment to maintain Breviolum minutum (J.E.Parkinson & LaJeunesse 2018)
Source: Frontiers journal article supplement (doi:10.3389/fmars.2022.934307), 2022-10-03
Supplement: downloadfile [file 934307]

**Supplementary Table 3.** BUSCO analysis results of the transcriptome of *Berghia stephanieae*

|                                     |      |       |
|-------------------------------------|------|-------|
| Complete BUSCOs (C)                 | 4591 | 86.7% |
| Complete and single-copy BUSCOs (S) | 1633 | 30.8% |
| Complete and duplicated BUSCOs (D)  | 2958 | 55.9% |
| Fragmented BUSCOs (F)               | 152  | 2.9%  |
| Missing BUSCOs (M)                  | 552  | 10.4% |
| Total BUSCO groups searched         | 5295 |       |
